# Supplementary material for: High-Performance Organic Field-Effect Transistors of Liquid Crystalline Organic Semiconductor by Laser Mapping Annealing
Source: MDPI journal article supplement (doi:10.3390/ma17061395), 2024-03-19
Supplement: s1 [file s1]

## **Supplementary Material**

# **High Performance Organic Field-effect Transistors of Liquid Crystalline Organic Semiconductor by Laser Mapping Annealing**

Luying Huang<sup>a, b</sup>, Fenghua Liu<sup>\*b, c</sup>, Jiachen Bao<sup>b, c</sup>, Xiaoman Li<sup>b, c</sup>, Yunjiao Gu<sup>b, c</sup>, and Weiping Wu<sup>\*\*b, c</sup>

<sup>a</sup>. Key Laboratory for Micro-Nano Physics and Technology of Hunan Province, College of Materials Science and Engineering, Hunan University, Changsha, 410082, China.

<sup>b</sup>. Laboratory of Thin Film Optics, Shanghai Institute of Optics and Fine Mechanics, Chinese Academy of Sciences, Shanghai, 201800, China.

<sup>c</sup>. State Key Laboratory of High Field Laser Physics, Chinese Academy of Sciences, Shanghai, 201800, China.

E-mail: fenghualiu@siom.ac.cn, wuwp@siom.ac.cn

## Table of Contents

1. **Figure S1.** Molecular structure of Ph-BTBT-12 material and its related information.
2. **Figure S2.** Molecular length of Ph-BTBT-12 material calculated by chem 3D.
3. **Figure S3.** Transmittance of Ph-BTBT-12 vaporized on a quartz wafer using thermal vapor deposition and annealed at different temperatures.
4. **Figure S4.** UV-Vis spectra of Ph-BTBT-12 vaporized on a quartz wafer using thermal vaporization after annealing at different temperatures.
5. **Figure S5.** AFM images of Ph-BTBT-12 films at different annealing temperatures a) room temperature, b) 100°C, c) 140°C, d) 180°C.
6. **Figure S6.** 3D AFM images before and after annealing of the material organ at room temperature.
7. **Figure S7.** Images of the laser spot in the laser annealing experiment.
8. **Figure S8.** Histogram of the mobility of devices prepared based on Ph-BTBT-12 as an active layer annealed after 100 °C.

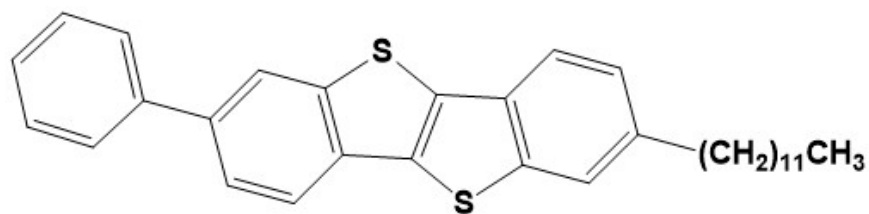

**Ph-BTBT-12**

3-dodecyl-8-phenylbenzo[*b*]benzo[4,5]thieno[2,3-*d*]thiophene

Chemical Formula: C<sub>32</sub>H<sub>36</sub>S<sub>2</sub>

Exact Mass: 484.23

Molecular Weight: 484.76

m/z: 484.23 (100.0%), 485.23 (36.6%), 486.22 (9.0%), 486.23 (6.4%), 487.22 (3.2%)

Elemental Analysis: C, 79.29; H, 7.49; S, 13.23

**Figure S1.** Molecular structure of Ph-BTBT-12 material and its related information.

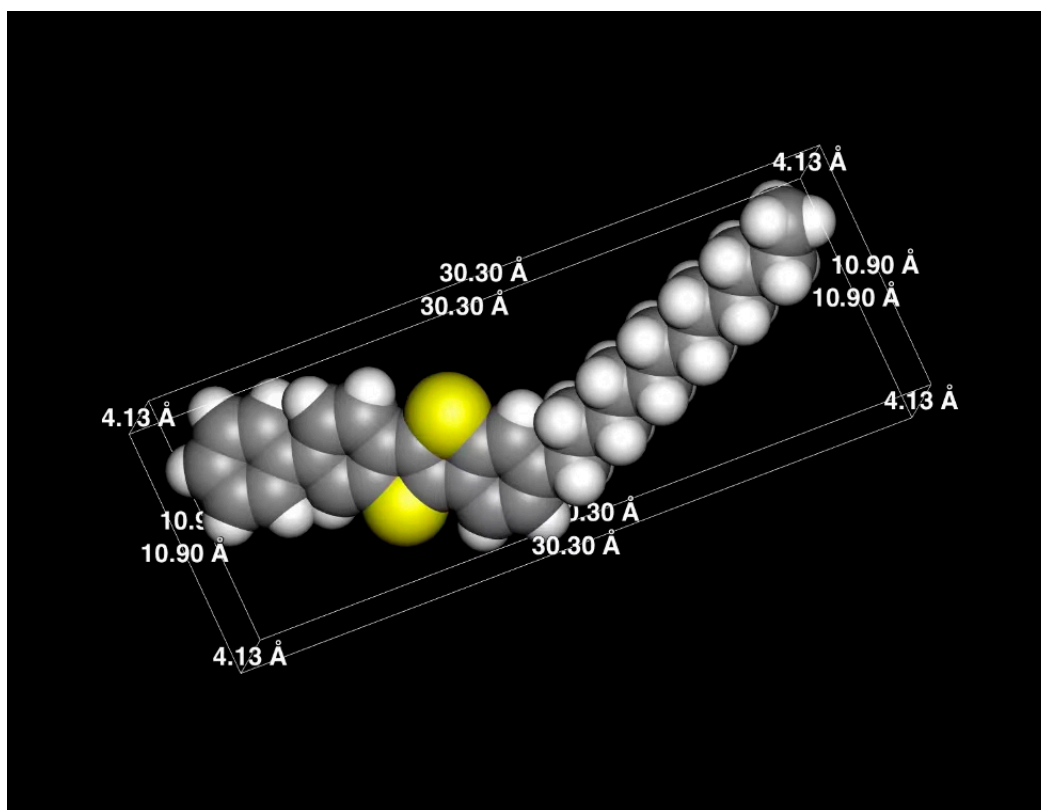

**Figure S2.** Molecular length of Ph-BTBT-12 material calculated by Chem 3D.

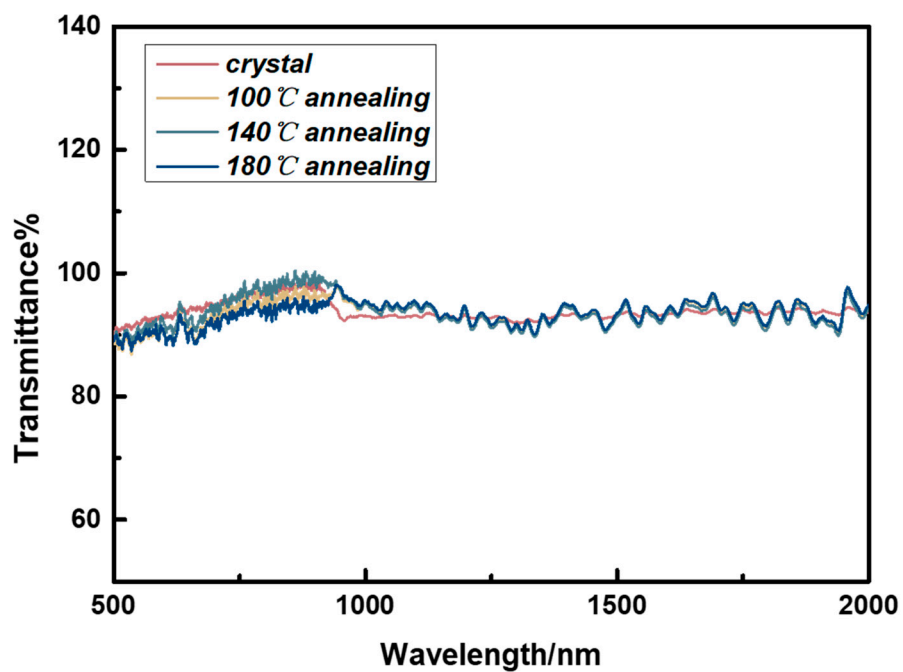

**Figure S3.** Transmittance of Ph-BTBT-12 vaporized on a quartz wafer using thermal vapor deposition and annealed at different temperatures.

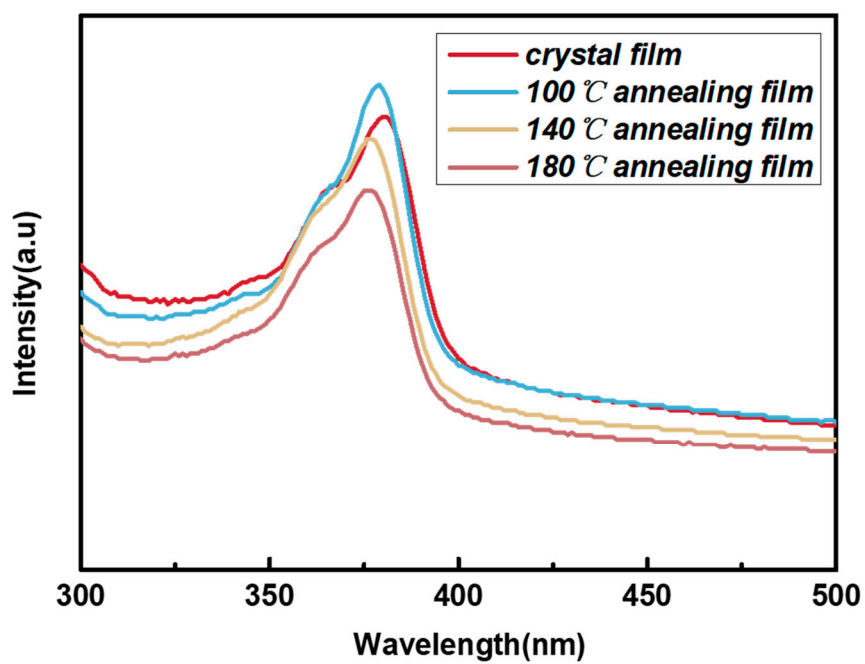

**Figure S4.** UV-Visible spectra of Ph-BTBT-12 vaporized on a quartz wafer using thermal vaporization after annealing at different temperatures.

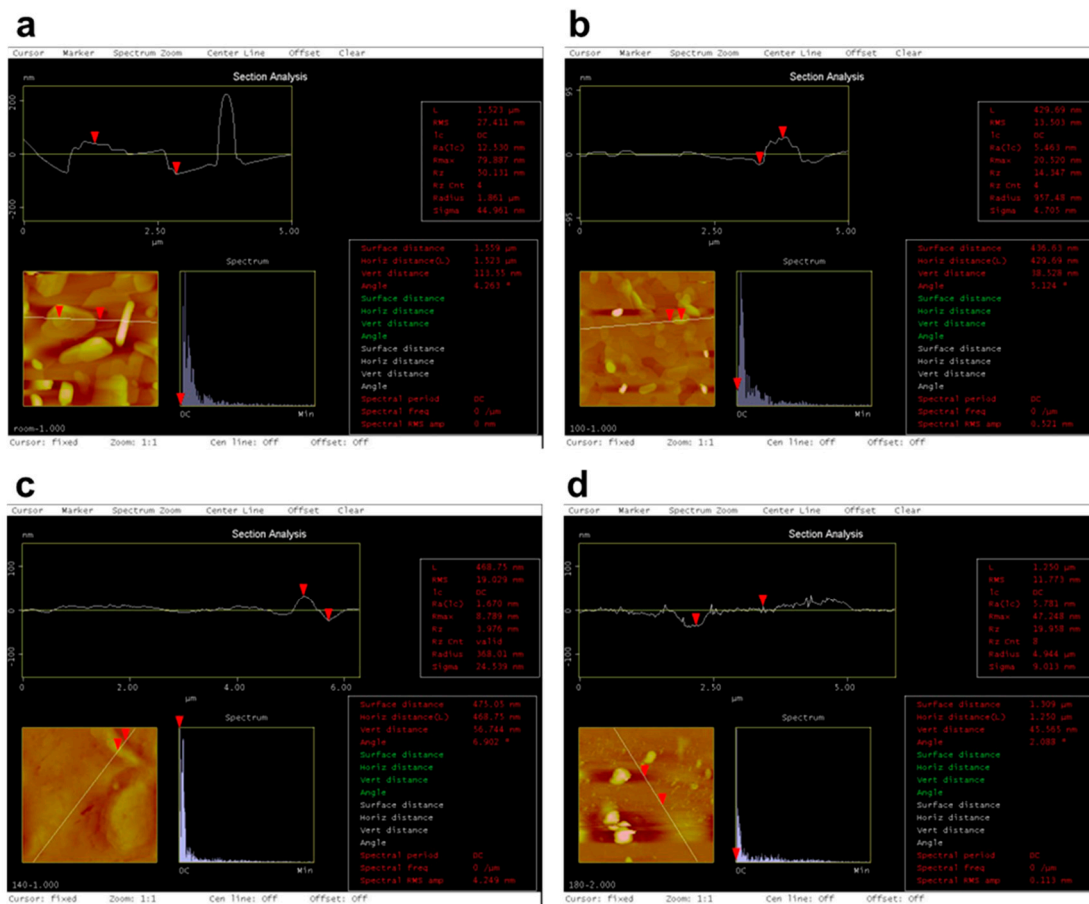

**Figure S5.** Surface AFM images of Ph-BTBT-12 films at different annealing temperatures a) room temperature, b) 100 °C, c) 140 °C, d) 180 °C.

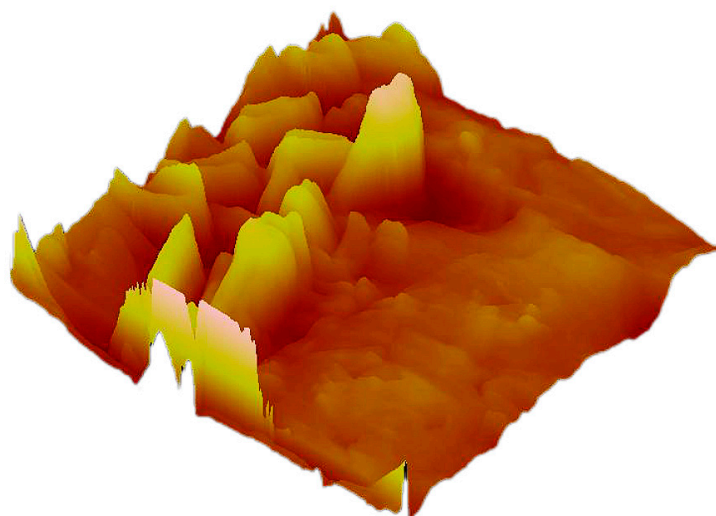

**Figure S6.** 3D AFM images before and after annealing of the material organ at room temperature.



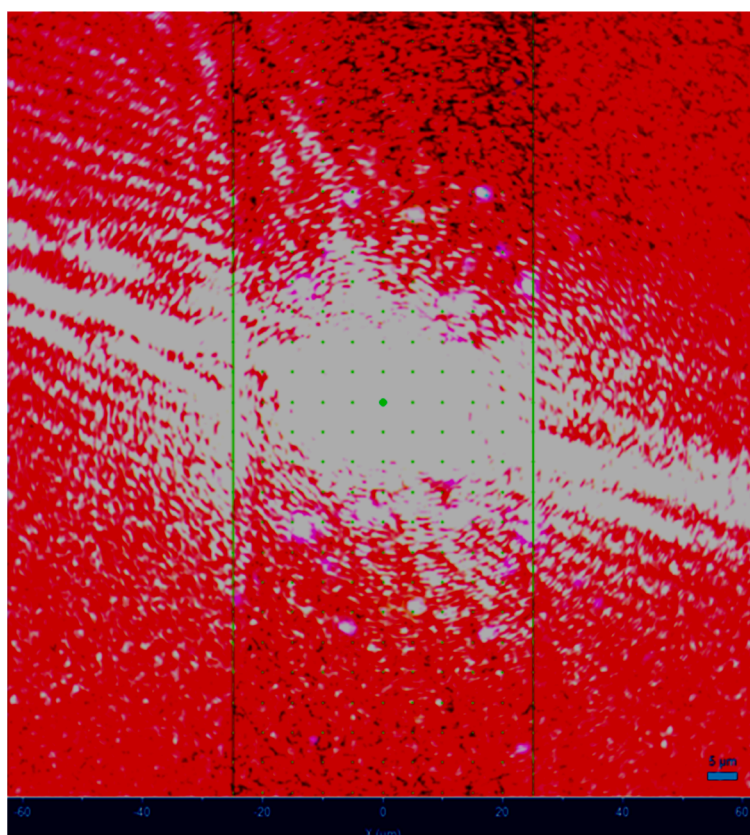

**Figure S7.** Images of the experiment with the laser turned on, and the approximate diameter range of the laser.

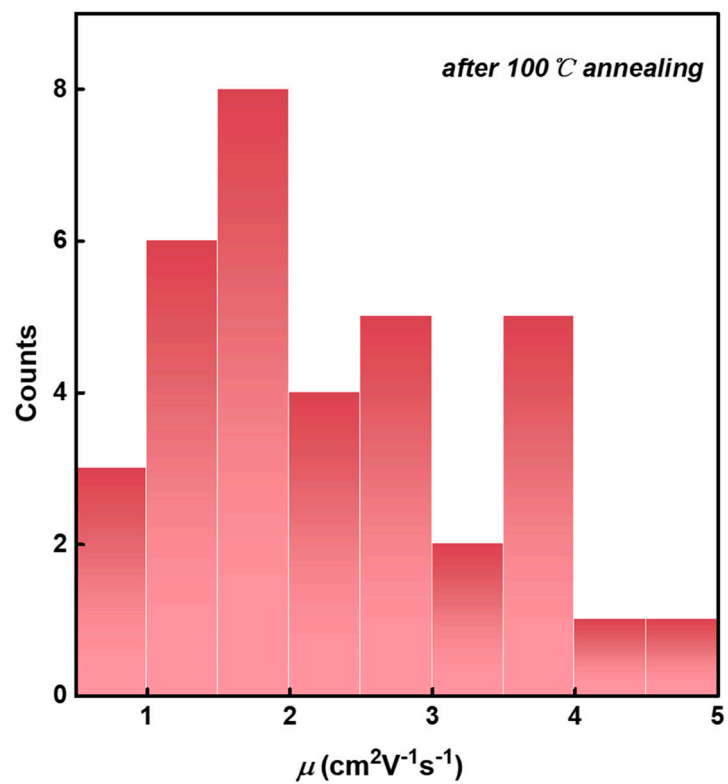

**Figure S8.** Histogram of the mobility of devices prepared based on Ph-BTBT-12 as an active layer annealed after 100 °C.
